# Supplementary material for: Transcriptome Analyses Reveal the Key Regulators of Tomato Compound Leaf Development
Source: MDPI journal article supplement (doi:10.3390/horticulturae9030363), 2023-03-10
Supplement: s1 [file s1]

**TABLE S1 | The profiles of RNA deep sequencing for VF36, *Pst*, CR, *tf2*, AC, *entire*.**

**TABLE S2 | Primers used in this study**

**TABLE S3 | RNA-Seq analysis of DEGs in *Pts*/VF36.**

**TABLE S4 | RNA-Seq analysis of DEGs in *tf2*/CR.**

**TABLE S5 | RNA-Seq analysis of DEGs in e/AC.**

**TABLE S6 | RNA-Seq analysis of DEGs in *Pts*/VF36 and *tf2*/CR.**

**TABLE S7 | RNA-Seq analysis of DEGs in *Pts*/VF36 and *entire*/AC.**

**TABLE S8 | RNA-Seq analysis of DEGs in *tf2*/CR and *entire*/AC.**

**Figure S1 | Morphological differences between mutant and wild-type plants.**

**Figure S2 | Go and KEGG enrichment analysis.**

**Figure S3 | Differences in leaf morphology of VIGS plants compared with that of *pTRV2* plants.**

**Figure S4 | SAM supplementary diagram**

**Table S1** The profiles of RNA deep sequencing for VF36, *Pts*, CR, *tf2*, AC, *entire*

| Sample   | Raw Read Number | Raw Q30 rate | Trimmed Read Number | Useful read% | Clean Reads | Uniquely Mapped% |
|----------|-----------------|--------------|---------------------|--------------|-------------|------------------|
| VF36-1   | 47429216        | 92.5         | 41989416            | 88.53        | 41989416    | 95.04            |
| VF36-2   | 38867902        | 91.9         | 34598214            | 89.01        | 34598214    | 94.78            |
| VF36-3   | 41163226        | 92.28        | 36463972            | 88.58        | 36463972    | 95.14            |
| Pts-1    | 39541314        | 91.88        | 34797720            | 88           | 37954732    | 95.77            |
| Pts-2    | 43494104        | 91.98        | 37954732            | 87.62        | 38875492    | 94.01            |
| Pts-3    | 44665608        | 92.14        | 38875492            | 87.03        | 34797720    | 93.84            |
| CR-1     | 38674246        | 92.29        | 35420234            | 91.58        | 35394168    | 94.84            |
| CR-2     | 45094878        | 92.63        | 40695638            | 90.24        | 35420234    | 94.16            |
| CR-3     | 39455908        | 91.87        | 35394168            | 89.7         | 40695638    | 95.19            |
| tf2-1    | 44666134        | 92.56        | 40306878            | 90.24        | 40306878    | 95.27            |
| tf2-2    | 39755182        | 92.19        | 33382472            | 83.97        | 33382472    | 95.84            |
| tf2-3    | 38234284        | 91.78        | 34266664            | 89.62        | 34266664    | 95.60            |
| AC-1     | 46930312        | 92.62        | 42060712            | 89.62        | 42060712    | 95.66            |
| AC-2     | 41162622        | 91.96        | 36089572            | 87.67        | 36089572    | 95.70            |
| AC-3     | 45496202        | 92.81        | 40427608            | 88.85        | 40427608    | 96.26            |
| entire-1 | 47962200        | 92.13        | 42276226            | 88.14        | 42276226    | 97.05            |
| entire-2 | 46075944        | 92.63        | 40971144            | 88.92        | 40971144    | 97.23            |
| entire-3 | 46207452        | 92.56        | 40776746            | 88.24        | 40776746    | 96.16            |

**Table S2** Primers used in this study.

| Gene             | Purpose   | sequence (5'-3')                                                                                                                       |
|------------------|-----------|----------------------------------------------------------------------------------------------------------------------------------------|
| <i>SIGA2ox7</i>  | VIGS      | Forward (KpnI) CCTCCATGGGGATCCGGTACCATGTACTTAG CCACCTCCAC TTCTC<br>Reverse (Infusion) GAGACGCATGAGCTCGGTACCGCATTCTTCT CTCTCAAATT CTCTT |
| <i>SIGA20ox</i>  | VIGS      | Forward (KpnI) CCTCCATGGGGATCCGGTACCAGCTGCATAACAATTGTCTAT<br>Reverse (Infusion) GAGACGCATGAGCTCGGTACCAAGTTTAAATAGTCAGAGCAA             |
| <i>SIIAA-aah</i> | VIGS      | Forward (KpnI) CCTCCATGGGGATCCGGTACCATGGGTACTA AGAAAGTTTT GGTCT<br>Reverse (Infusio) GAGACGCATGAGCTCGGTACCAACGACACCGGTTTTAGCCA CCGGC   |
| <i>SlbHLH079</i> | VIGS      | Forward (KpnI) CCTCCATGGGGATCCGGTACCATGGAGCAGCAGTACTGTTCTAACA<br>Reverse (Infusion) GAGACGCATGAGCTCGGTACCAGTGTTACTG CTTGAATTTG AATTC   |
| <i>SIWRKY44</i>  | VIGS      | Forward (KpnI) CCTCCATGGGGATCCGGTACCATGGCGATTACTGCCATAAGACCA<br>Reverse (Infusion) GAGACGCATGAGCTCGGTACCATGATGTTGTTTAGCTTCTTT          |
| <i>SIWRKY76</i>  | VIGS      | Forward (KpnI) CCTCCATGGGGATCCGGTACCGCTAAGGAAAGATAGAGCAATGG<br>Reverse (Infusion) GAGACGCATGAGCTCGGTACCTCTCCCTAAGCTCAAAGAAACA          |
| Actin            | reference | Forward TGTCCCTATTTACGAGGGTTATGC<br>Reverse AGTTAAATCACGACCAGCAAGAT                                                                    |
| <i>SIGA2ox7</i>  | RT-qPCR   | Forward CTTGTACACAGCAGCCAAACC<br>Reverse CCCCATTCTTGTGAAGCTTGTG                                                                        |
| <i>SIGA20ox</i>  | RT-qPCR   | Forward GCAAGCTTGGAGCAATGACA<br>Reverse CCAGAGGTAGGTGGAGCCT                                                                            |
| <i>SIIAA-aah</i> | RT-qPCR   | Forward GGGCGCGAAGAAGAATGTTT<br>Reverse AACGACACCGGTTTTAGCCA                                                                           |
| <i>SlbHLH079</i> | RT-qPCR   | Forward TCAACTTGAAGAAGCCGCGA                                                                                                           |

|                 |         |                                 |
|-----------------|---------|---------------------------------|
| <i>SlWRKY44</i> | RT-qPCR | Reverse GTGGCAATGGCAATGTATTTTCC |
|                 |         | Forward AGAGCACAGAAGAGGTCCCA    |
| <i>SlWRKY76</i> | RT-qPCR | Reverse GACAAGTTGCGCTTTGGAGG    |
|                 |         | Forward TGATGTAAACGCCAGGTGCT    |
|                 |         | Reverse TCAGTGGGAACCAAAGTGGG    |

**Table S3** RNA-Seq analysis of DEGs in *Pts*/VF36.

| Gene ID( <i>Pts</i> /VF36) | TF       | Description                                                                             | Regulation      |
|----------------------------|----------|-----------------------------------------------------------------------------------------|-----------------|
| Solyc05g052040.1           | ERF      | PREDICTED:ethylene-responsive transcription factor 5 [Solanum lycopersicum]             | Down Regulation |
| Solyc10g084380.1           | WRKY     | PREDICTED:WRKY transcription factor 44 [Solanum lycopersicum]                           | Down Regulation |
| Solyc05g007110.2           | WRKY     | PREDICTED: probable WRKY transcription factor 72 isoform X1 [Solanum lycopersicum]      | Up Regulation   |
| Solyc10g009290.1           | bHLH     | PREDICTED: transcription factor MYC3-like [Solanum lycopersicum]                        | Up Regulation   |
| Solyc04g006980.1           | TCP      | TCP transcription factor 22 [Solanum lycopersicum]                                      | Down Regulation |
| Solyc06g065190.1           | TCP      | TCP transcription factor 13 [Solanum lycopersicum]                                      | Down Regulation |
| Solyc06g075670.1           | MYB      | PREDICTED: transcription factor MYB48-like [Solanum pennellii]                          | Up Regulation   |
| Solyc08g074860.1           | bZIP     | PREDICTED: stress response protein NST1-like [Solanum lycopersicum]                     | Up Regulation   |
| Solyc06g066540.1           | ERF      | PREDICTED: dehydration-responsive element-binding protein 3-like [Solanum lycopersicum] | Up Regulation   |
| Solyc02g030460.2           | Trihelix | PREDICTED: uncharacterized protein LOC101256819 [Solanum lycopersicum]                  | Down Regulation |
| Solyc02g077590.1           | HD-ZIP   | PREDICTED: homeobox-leucine zipper protein ATHB-52 [Solanum lycopersicum]               | Up Regulation   |
| Solyc02g092570.1           | GRAS     | PREDICTED: scarecrow-like protein 32 [Solanum lycopersicum]                             | Down Regulation |

**Table S4** RNA-Seq analysis of DEGs in *tf2/CR*.

| Gene ID( <i>tf2/CR</i> ) | TF      | Description                                                                             | Regulation      |
|--------------------------|---------|-----------------------------------------------------------------------------------------|-----------------|
| Solyc10g052470.1         | MYB     | PREDICTED: protein RADIALIS-like 1 [Solanum pennellii]                                  | Down Regulation |
| Solyc10g078610.1         | ERF     | PREDICTED: ethylene-responsive transcription factor RAP2-11-like [Solanum lycopersicum] | Up Regulation   |
| Solyc10g084380.1         | WRKY    | PREDICTED: WRKY transcription factor 44 [Solanum lycopersicum]                          | Down Regulation |
| Solyc11g020670.1         | TCP     | TCP transcription factor 12 [Solanum lycopersicum]                                      | Up Regulation   |
| Solyc10g086380.1         | GRAS    | PREDICTED: DELLA protein GAI-like [Solanum lycopersicum]                                | Up Regulation   |
| Solyc05g051200.1         | ERF     | ethylene-responsive factor 1 [Solanum lycopersicum]                                     | Up Regulation   |
| Solyc05g007110.2         | WRKY    | PREDICTED: probable WRKY transcription factor 72 isoform X1 [Solanum lycopersicum]      | Down Regulation |
| Solyc08g014030.1         | GRAS    | PREDICTED: protein SHORT-ROOT-like [Solanum lycopersicum]                               | Up Regulation   |
| Solyc03g062750.1         | NAC     | PREDICTED: NAC transcription factor 56-like [Solanum pennellii]                         | Down Regulation |
| Solyc01g109690.1         | MYB     | PREDICTED: protein RADIALIS-like 4 [Solanum lycopersicum]                               | Down Regulation |
| Solyc06g065440.1         | C2H2    | protein SENSITIVE TO PROTON RHIZOTOXICITY 1-like [Solanum lycopersicum]                 | Up Regulation   |
| Solyc10g080960.1         | G2-like | PREDICTED: transcription factor PCL1-like [Solanum lycopersicum]                        | Down Regulation |
| Solyc05g052040.1         | ERF     | ethylene-responsive transcription factor 5 [Solanum lycopersicum]                       | Down Regulation |
| Solyc05g054650.1         | C2H2    | PREDICTED: zinc finger protein ZAT11-like [Solanum lycopersicum]                        | Up Regulation   |

**Table S5** RNA-Seq analysis of DEGs in *e/AC*.

| Gene ID( <i>entire/AC</i> ) | TF   | Description                                                         | Regulation      |
|-----------------------------|------|---------------------------------------------------------------------|-----------------|
| Solyc10g084380.1            | WRKY | PREDICTED: WRKY transcription factor 44 [Solanum lycopersicum]      | Down Regulation |
| Solyc10g054010.1            | bZIP | PREDICTED: ocs element-binding factor 1-like [Nicotiana sylvestris] | Up Regulation   |
| Solyc01g109690.1            | MYB  | PREDICTED: protein RADIALIS-like 4 [Solanum lycopersicum]           | Down Regulation |
| Solyc10g009290.1            | bHLH | PREDICTED: transcription factor MYC3-like [Solanum lycopersicum]    | Down Regulation |
| Solyc02g092570.1            | GRAS | PREDICTED: scarecrow-like protein 32 [Solanum lycopersicum]         | Down Regulation |
| Solyc04g006980.1            | TCP  | TCP transcription factor 22 [Solanum lycopersicum]                  | Down Regulation |

**Table S6.** RNA-Seq analysis of DEGs in *Pts*/VF36 and *tf2*/CR.

| Gene ID          | <i>Pts</i> /VF36 | Log <sub>2</sub><br>(FC) | <i>tf2</i> /CR | Log <sub>2</sub><br>(FC) | Description                                                                   |
|------------------|------------------|--------------------------|----------------|--------------------------|-------------------------------------------------------------------------------|
| Solyc05g006220.3 | Upregulation     | 1.57                     | Downregulation | −1.95                    | IAA-amino acid hydrolase                                                      |
| Solyc02g078130.3 | Upregulation     | 2.29                     | Downregulation | −2.44                    | <i>SibHLH079</i> is part of the 159 member basic helix-loop-helix gene family |
| Solyc06g083900.3 | Upregulation     | 2.28                     | Downregulation | −6.30                    | <i>SIMYB13</i> is a member of <i>SIR2R3</i> MYB gene family                   |
| Solyc05g007110.2 | Upregulation     | 4.49                     | Downregulation | −4.82                    | <i>SIWRKY76</i> is a member of WRKY transcription factor gene family          |
| Solyc02g080120.3 | Upregulation     | 2.46                     | Downregulation | −1.64                    | Gibberellin 2-beta-dioxygenase 7                                              |

**Table S7.** RNA-Seq analysis of DEGs in *Pts*/VF36 and *entire*/AC.

| Gene ID          | <i>Pts</i> /VF36 | Log <sub>2</sub><br>(FC) | <i>tf2</i> /CR | Log <sub>2</sub><br>(FC) | Description                                |
|------------------|------------------|--------------------------|----------------|--------------------------|--------------------------------------------|
| Solyc10g009290.1 | Upregulation     | 1.54                     | Downregulation | −1.53                    | bHLH transcription factor <i>SlbHLH155</i> |
| Solyc01g094590.4 | Downregulation   | −1.55                    | Upregulation   | 1.05                     | Gibberellin 20-oxidase-like protein        |

**Table S8.** RNA-Seq analysis of DEGs in *tf2*/CR and *entire*/AC.

| Gene ID          | <i>tf2</i> /CR | Log <sub>2</sub><br>(FC) | <i>entire</i> /AC | Log <sub>2</sub><br>(FC) | Description                                                          |
|------------------|----------------|--------------------------|-------------------|--------------------------|----------------------------------------------------------------------|
| Solyc10g084380.1 | Downregulation | −2.38                    | Downregulation    | −3.51                    | <i>SlWRKY44</i> is a member of WRKY transcription factor gene family |
| Solyc01g105800.4 | Downregulation | −2.38                    | Downregulation    | −1.92                    | MADS box transcription factor                                        |



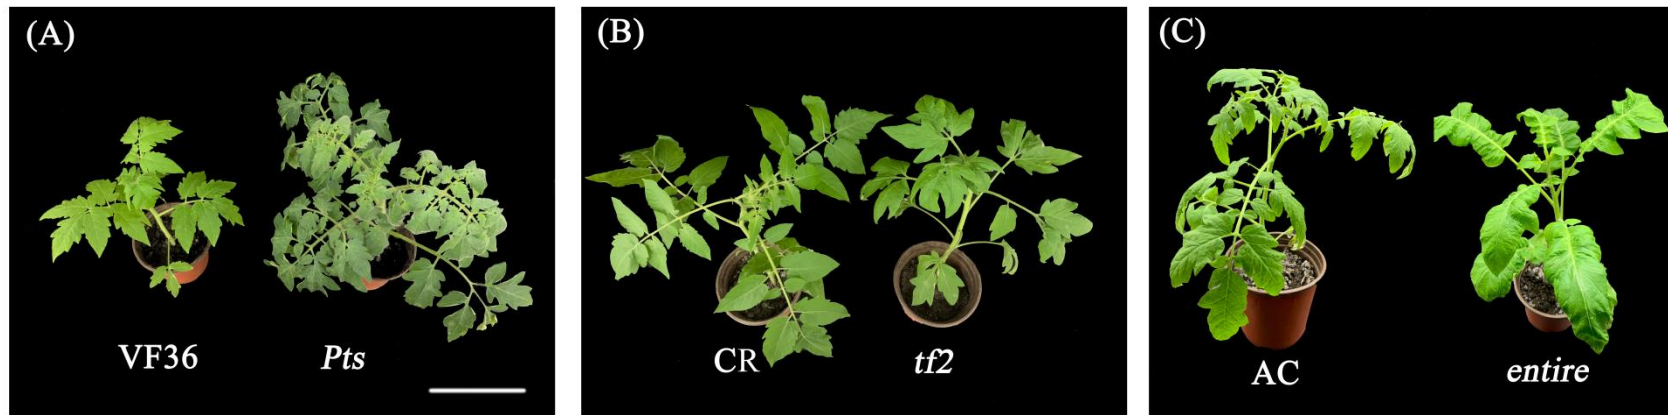

Figure S1. Morphological differences between mutant and wild-type plants. (A–C) 45-d-old plants. Bars=500  $\mu$ m in (A–F).

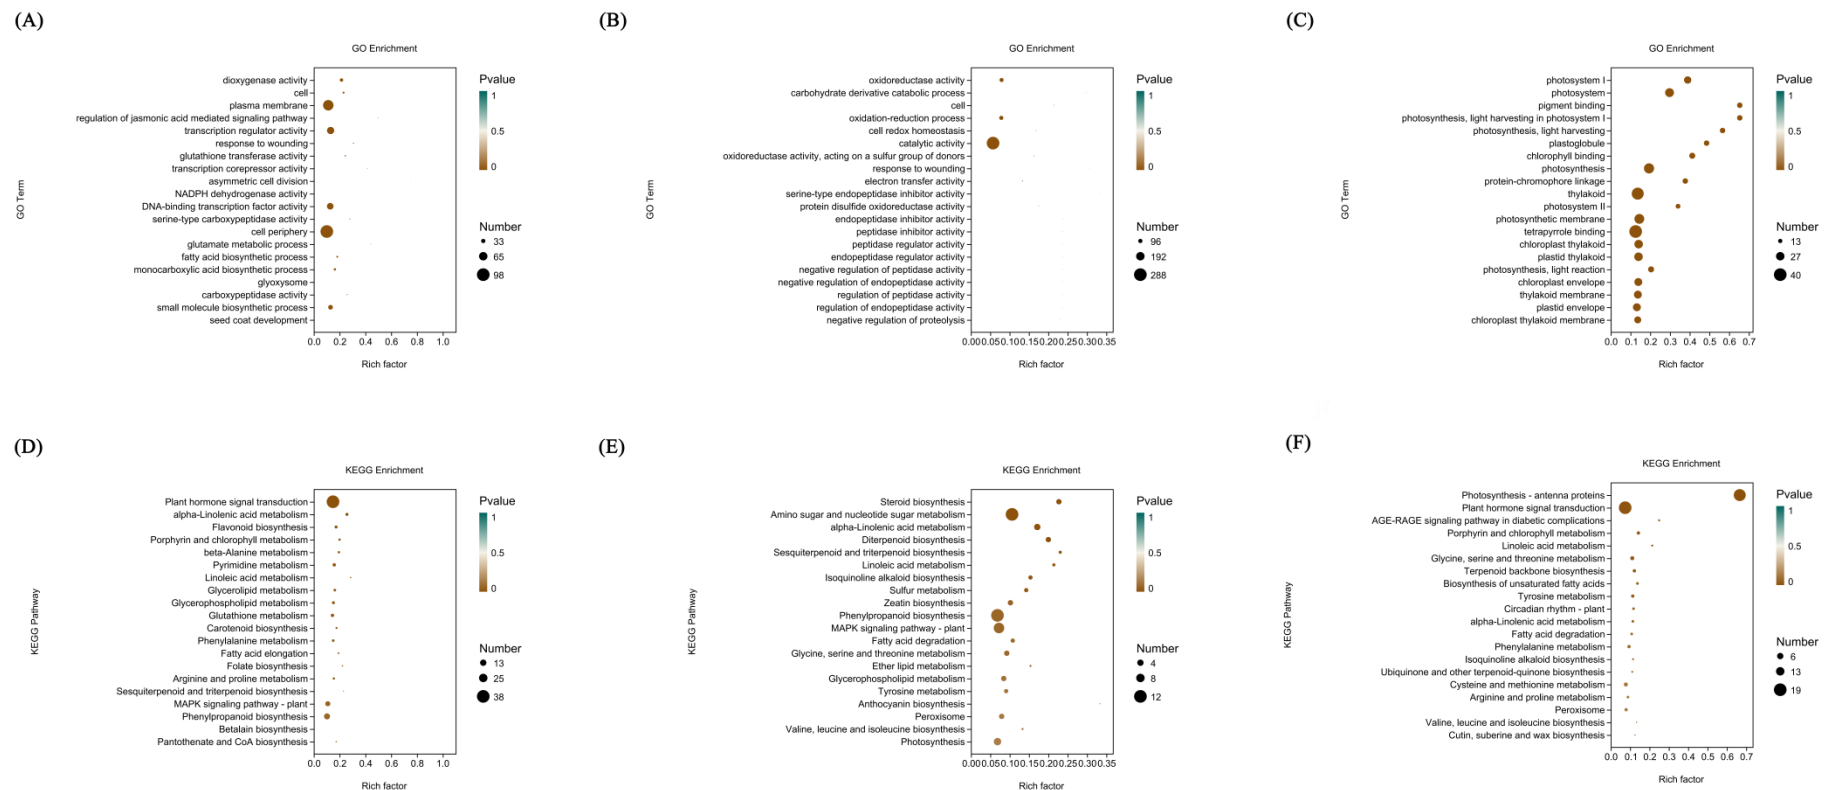

Figure S2. Go and KEGG enrichment analysis. (A–C) The abscissa is the rich factor (number of differentially annotated genes to the GO Term/total number of genes annotated to the GO Term), and the ordinate is the GO Term. The size of the midpoint in the figure represents the number of differentially annotated genes (upregulated or downregulated, which is related to the gene set selected during analysis) in the corresponding Term. The depth of the color indicates the level of significance. (A–C) Pts/VF36, tf2/CR, e/AC, respectively. (D–F) The abscissa is the Rich factor (number of differentially annotated genes into Pathway/total number of genes annotated into Pathway), and the ordinate is the Pathway. The size of the midpoint in the figure represents the number of differentially annotated genes (upregulated or downregulated, which is related to the gene

set selected during analysis) in the corresponding Pathway. The depth of the color indicates the level of significance. (D–F) Pts/VF36, tf2/CR, e/AC, respectively.

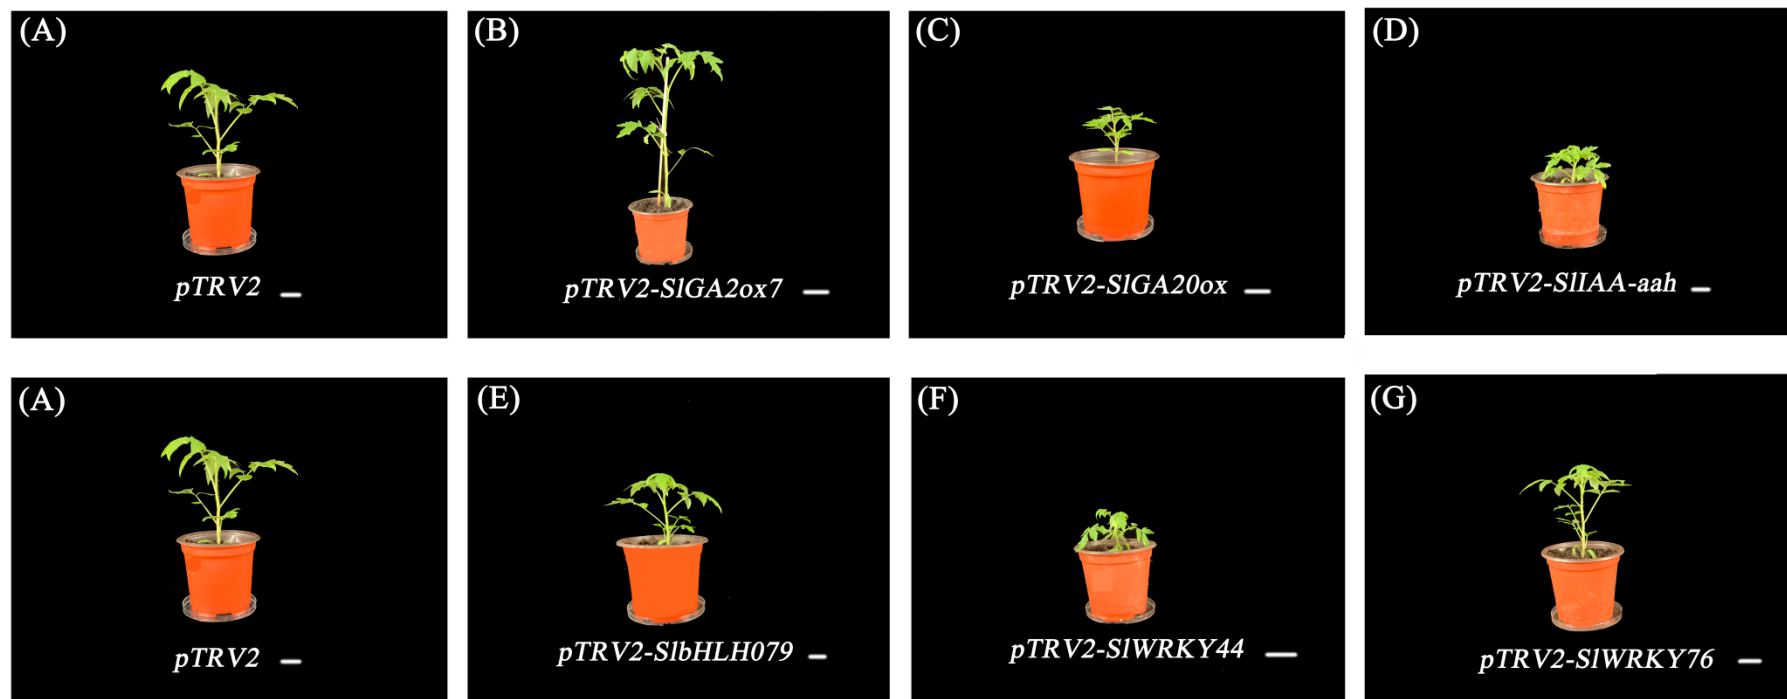

**Figure S3.** Differences in leaf morphology of VIGS plants compared with that of pTRV2 plants. (A–G) Height of VIGS and pTRV2 plants at 45 d. pTRV2 plants were used as the control. Bars = 4 cm.

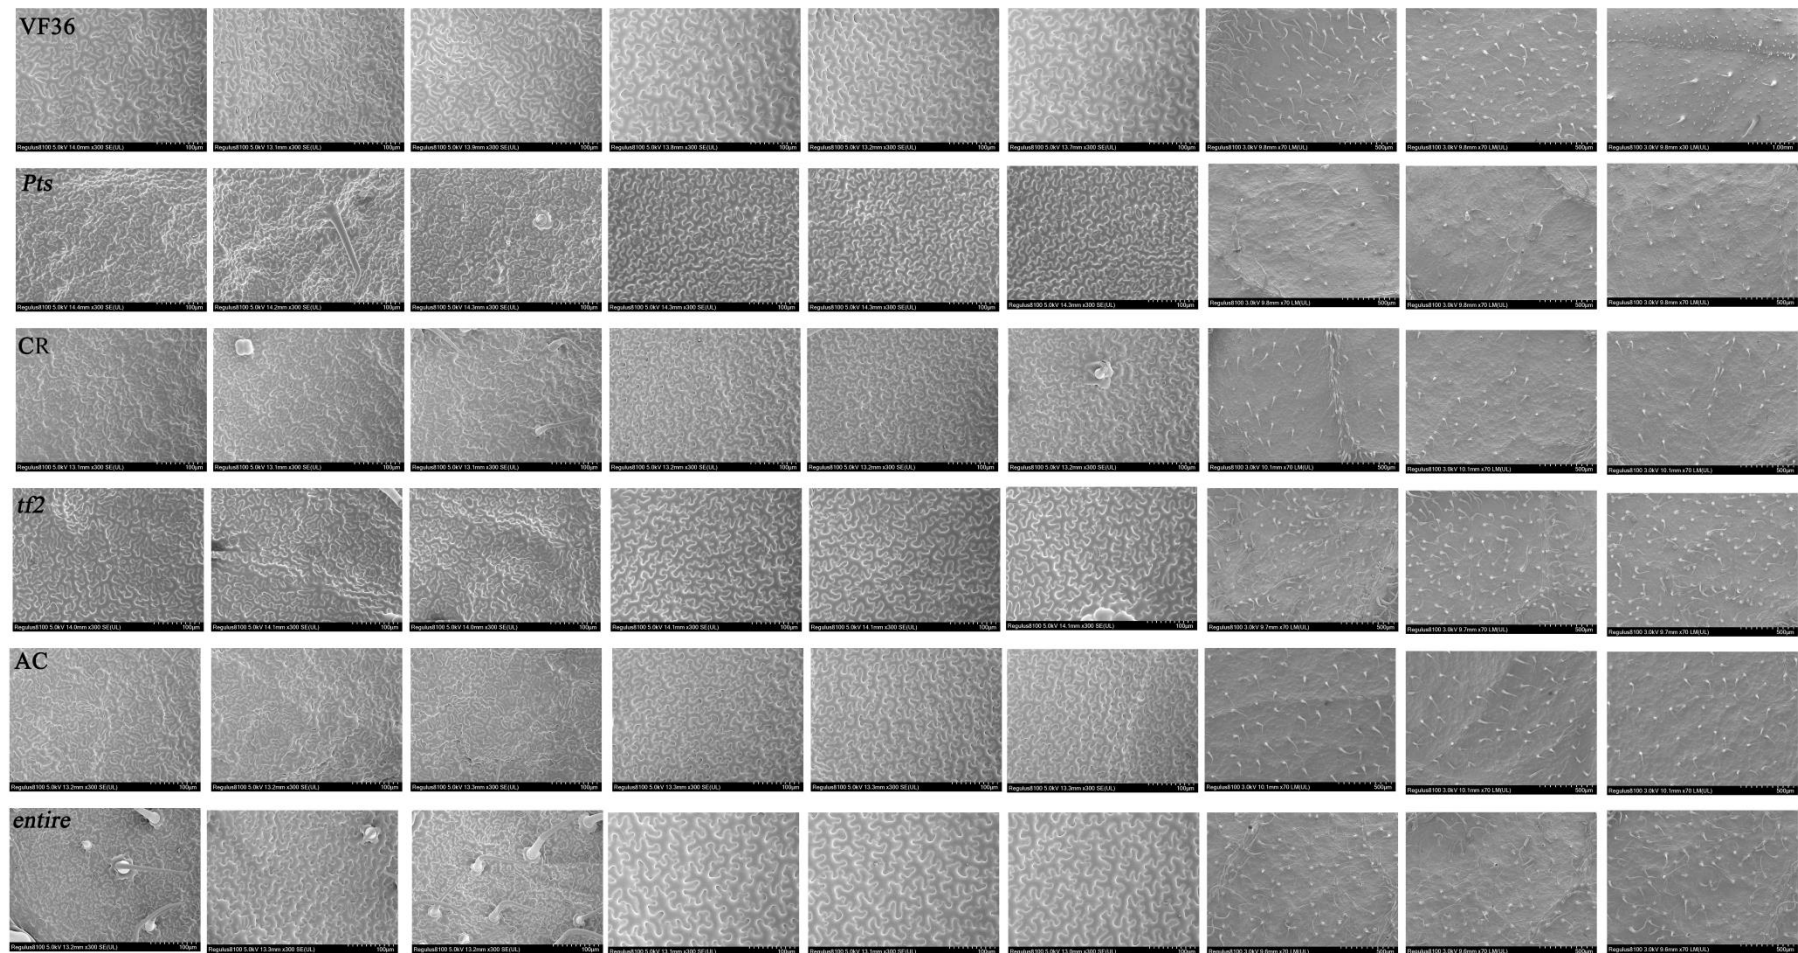

Figure S4. Stomata, epidermal cells, leaf hair supplement.
